# Supplementary material for: The absorption Ångstrom exponent of black carbon with brown coatings: effects of aerosol microphysics and parameterization
Source: Copernicus journal article supplement (doi:10.5194/acp-20-9701-2020), 2020-08-19
Supplement: Supplementary file 1 [file acp-20-9701-2020-supplement.pdf]

Supplement of Atmos. Chem. Phys., 20, 9701–9711, 2020  
<https://doi.org/10.5194/acp-20-9701-2020-supplement>  
© Author(s) 2020. This work is distributed under  
the Creative Commons Attribution 4.0 License.

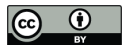

Atmospheric  
Chemistry  
and Physics  
Open Access  
EGU

*Supplement of*

## **The absorption Ångstrom exponent of black carbon with brown coatings: effects of aerosol microphysics and parameterization**

**Xiaolin Zhang et al.**

*Correspondence to:* Xiaolin Zhang (xlnzhang@nuist.edu.cn) and Mao Mao (mmao@nuist.edu.cn)

The copyright of individual parts of the supplement might differ from the CC BY 4.0 License.

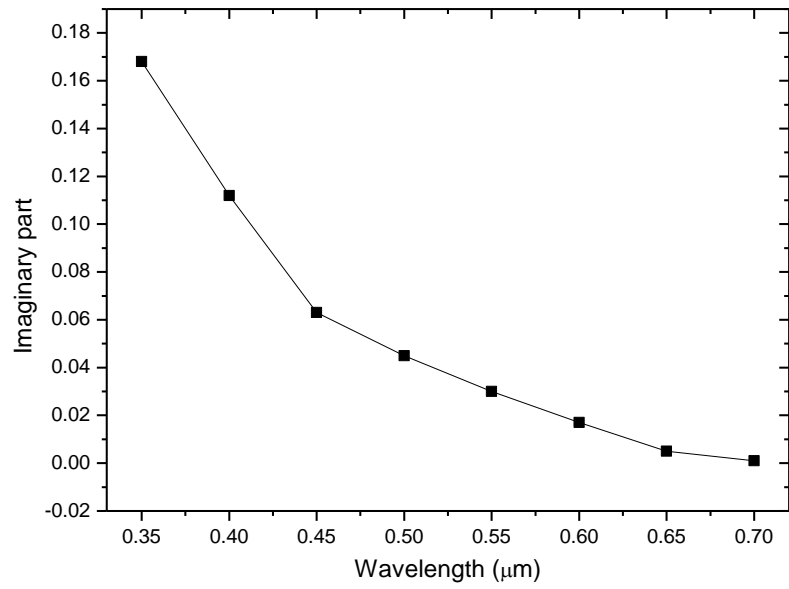

**Fig. S1.** Imaginary part of refractive index of brown carbon as a function of wavelength based on Kirchstetter et al. [2004].

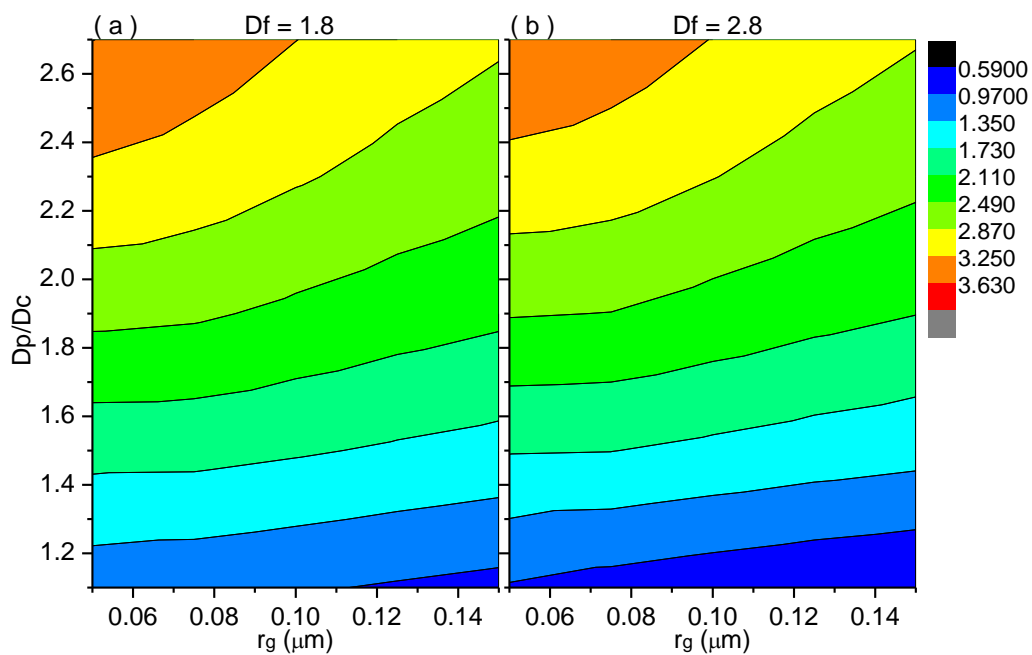

**Fig. S2.** The absorption Angstrom exponent (AAE) of BC aggregates coated by brown carbon with different shell/core ratio ( $D_p/D_c$ ) and particle size distribution. BC fractal dimension of 1.8 and 2.8 are shown from left to right. Coated volume fraction of BC is 0.0, and geometric standard deviations ( $\sigma_g$ ) for applied lognormal distribution are 1.59.

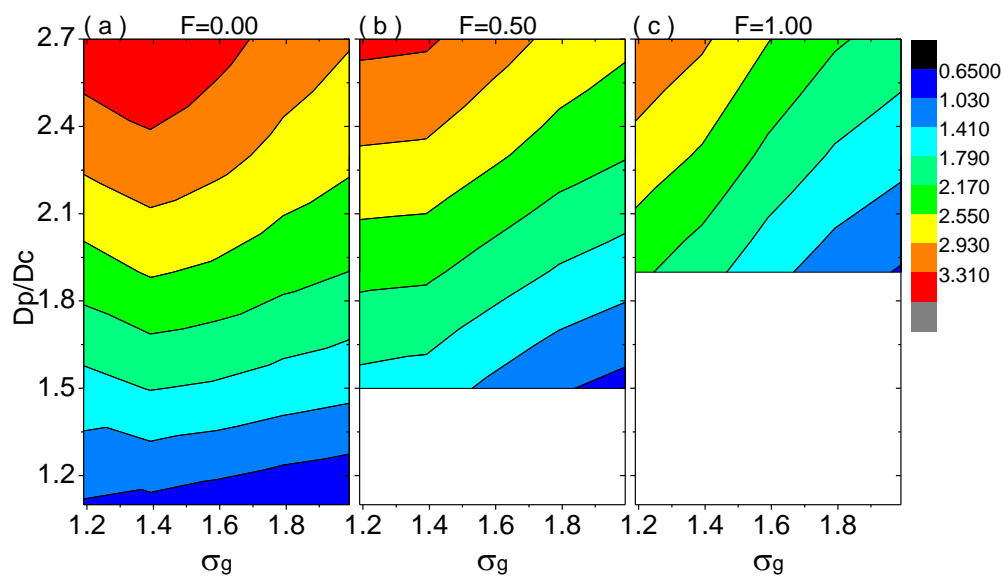

**Fig. S3.** The absorption Angstrom exponent (AAE) of BC aggregates (BC fractal dimension of  $\sim 2.8$ ) coated by brown carbon with different shell/core ratio ( $D_p/D_c$ ) and particle size distribution. Three coated volume fractions of BC, being 0.00, 0.50, and 1.00, are shown from left to right. For fully coated BC structure, BC is located at the particle geometric center. The geometric mean radii ( $r_g$ ) for applied lognormal distribution are  $0.075 \mu\text{m}$ .

**Reference**

Kirchstetter, T. W., Novakov, T., and Hobbs, P. V.: Evidence that the spectral dependence of light absorption by aerosols is affected by organic carbon, *J. Geophys. Res.*, 109, D21208, 2004.
